adverse outcomes after orthotopic liver transplantation. *J Cardiothorac Vasc Anesth* 2003; 17:699-702

5. Sandid MS, Assi MA, Hall S: Intraoperative hypotension and prolonged operative time as risk factors for slow graft function in kidney transplant recipients. *Clin Transplant* 2006; 20:762-8

6. Monk TG, Saini V, Weldon BC, Sigl JC: Anesthetic management and one-year mortality after noncardiac surgery. *Anesth Analg* 2005; 100:4-10

7. Bijker JB, van Klei WA, Kappen TH, van Wolfswinkel L, Moons KG, Kalkman CJ: Incidence of intraoperative hypotension as a function of the chosen definition: Literature definitions applied to a retrospective cohort using automated data collection. *ANESTHESIOLOGY* 2007; 107:213-20

8. Limburg M, Wijdicks EF, Li H: Ischemic stroke after surgical procedures: Clinical features, neuroimaging, and risk factors. *Neurology* 1998; 50:895-901

9. Williams-Russo P, Sharrock NE, Mattis S, Liguori GA, Mancuso C, Peterson MG, Hollenberg J, Ranawat C, Salvati E, Sculco T: Randomized trial of hypotensive epidural anesthesia in older adults. *ANESTHESIOLOGY* 1999; 91:926-35

10. Paul JE, Ling E, Lalonde C, Thabane L: Deliberate hypotension in ortho-

pedic surgery reduces blood loss and transfusion requirements: A meta-analysis of randomized controlled trials. *Can J Anaesth* 2007; 54:799-810

11. van Klei WA, Hennis PJ, Moen J, Kalkman CJ, Moons KG: The accuracy of trained nurses in pre-operative health assessment: Results of the OPEN study. *Anaesthesia* 2004; 59:971-8

12. Marsh B, White M, Morton N, Kenny GN: Pharmacokinetic model driven infusion of propofol in children. *Br J Anaesth* 1991; 67:41-8

13. Hollos L, Enraght-Moony N: Effect site targeted propofol infusion in clinical practice: Comparison to Diprifusor. *Internet J Anesthesiol* 2001; 5

14. Harrell FE Jr, Lee KL, Mark DB: Multivariable prognostic models: Issues in developing models, evaluating assumptions and adequacy, and measuring and reducing errors. *Stat Med* 1996; 15:361-87

15. Schoenfeld D: Partial residuals for the proportional hazards regression model. *Biometrika* 1982; 69:239-41

16. Lindholm ML, Träff S, Granath F, Greenwald SD, Ekborn A, Lennmarken C, Sandin RH: Mortality within 2 years after surgery in relation to low intraoperative bispectral index values and preexisting malignant disease. *Anesth Analg* 2009; 108:508-12

## ANESTHESIOLOGY REFLECTIONS

### Fourneau Synthesizes Stovaine

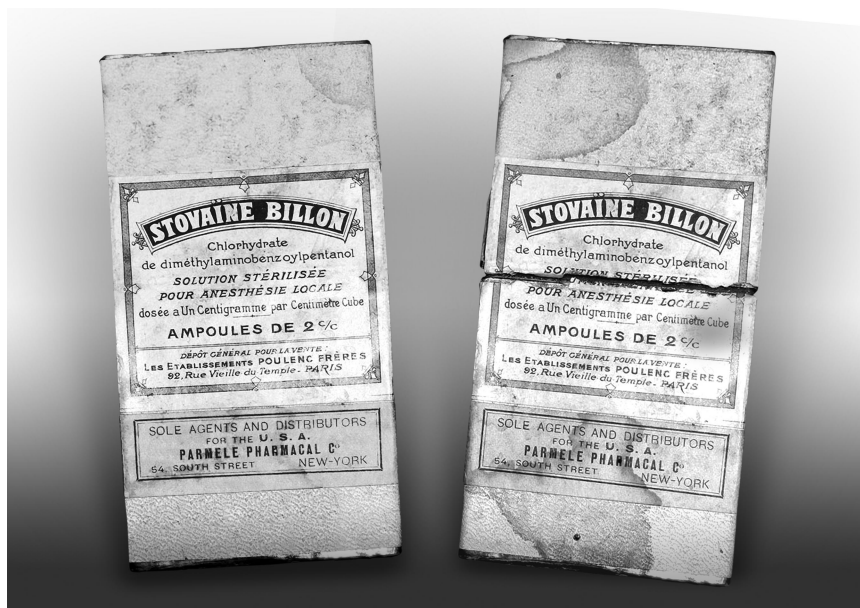

A French pharmacist and chemotherapeutic researcher, Ernest A. Fourneau (1872–1949) synthesized a nonaddicting and less toxic alternative to cocaine for use as a local anesthetic. His Poulenc Frères Company of Paris filed for a trademark and at least three U.S. Patents to safeguard mass production of this agent synthesized by Fourneau, whose surname in French means “stove.” When distributed from New York by Parmele Pharmacal Company (*see the example above from the Wood Library-Museum*), the synthetic local anesthetic was prudently released to the English-speaking world as “Stovaine,” rather than the socially awkward “Fourneau-caine.” (Copyright © the American Society of Anesthesiologists, Inc. This image appears in color in the *Anesthesiology Reflections* online collection available at [www.anesthesiology.org](http://www.anesthesiology.org).)

*George S. Bause, M.D., M.P.H., Honorary Curator, ASA’s Wood Library-Museum of Anesthesiology, Park Ridge, Illinois, and Clinical Associate Professor, Case Western Reserve University, Cleveland, Ohio. UJYC@aol.com.*
